# Supplementary material for: The Impact of Various Promotional Activities on Ebola Prevention Behaviors and Psychosocial Factors Predicting Ebola Prevention Behaviors in the Gambia Evaluation of Ebola Prevention Promotions
Source: PubMed Central journal article supplement (PMC6603859; doi:10.3390/ijerph16112020), 2019-06-06
Supplement: ijerph-16-02020-s001.pdf [file ijerph-16-02020-s001.pdf]

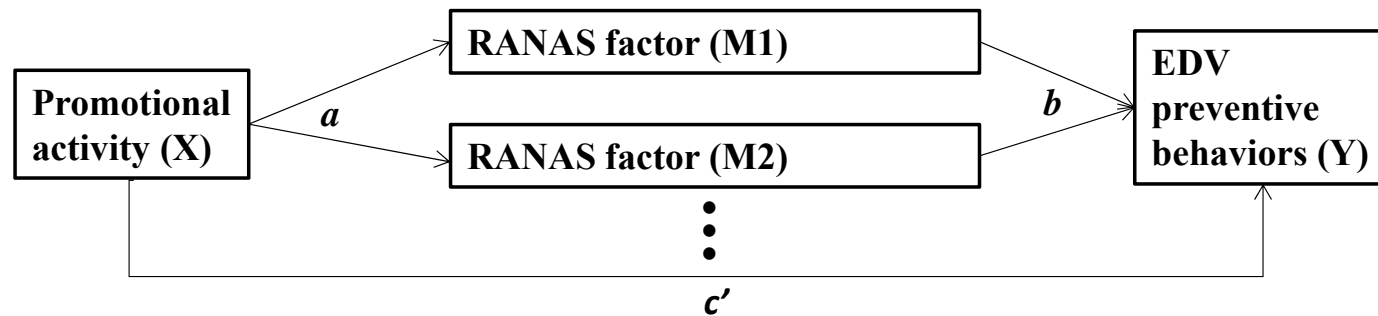

**Figure S1.** Template of a parallel multiple mediator model. RANAS psychosocial factors as mediators (M), promotion activities as predictors (X), and EDV preventive behaviors as outcomes (Y) are presented in mediator model. Calculations: (1) the direct effect ( $c'$ ), the effect of the promotion activity on the EDV preventive behavior when the mediators are not present in the model (X on Y independent of M); (2) the specific indirect effect ( $a \times b$ ); (3) total effect ( $c$ ), the sum of the specific indirect effect ( $a \times b$ ) and the direct effect ( $c'$ ). Number of bootstrap samples for bias corrected bootstrap confidence intervals: 10'000. Level of confidence for all confidence intervals: 95% CL [LL, UL].
